# Supplementary material for: SPOP mutations increase PARP inhibitor sensitivity via CK2/PIAS1/SPOP axis in prostate cancer
Source: JCI journal article supplement (doi:10.1172/jci.insight.186871), 2025-04-21
Supplement: sd1 [file 1]

Supplementary materials for

***SPOP* mutations increase PARP inhibitor sensitivity via CK2-PIAS1-SPOP axis in prostate cancer**

Hui Zhang *et.al*

Corresponding author: [jinxiaofeng@nbu.edu.cn](mailto:jinxiaofeng@nbu.edu.cn) (X.J.); [fyyyanzejun@nbu.edu.cn](mailto:fyyyanzejun@nbu.edu.cn) (Z.Y.)

**The PDF file includes:**

Supplementary Figure 1 to 10

Supplementary Table 1 to 2

**Other Supplementary Material for this manuscript includes the following:**

Supporting data values and full unedited blot/gel images

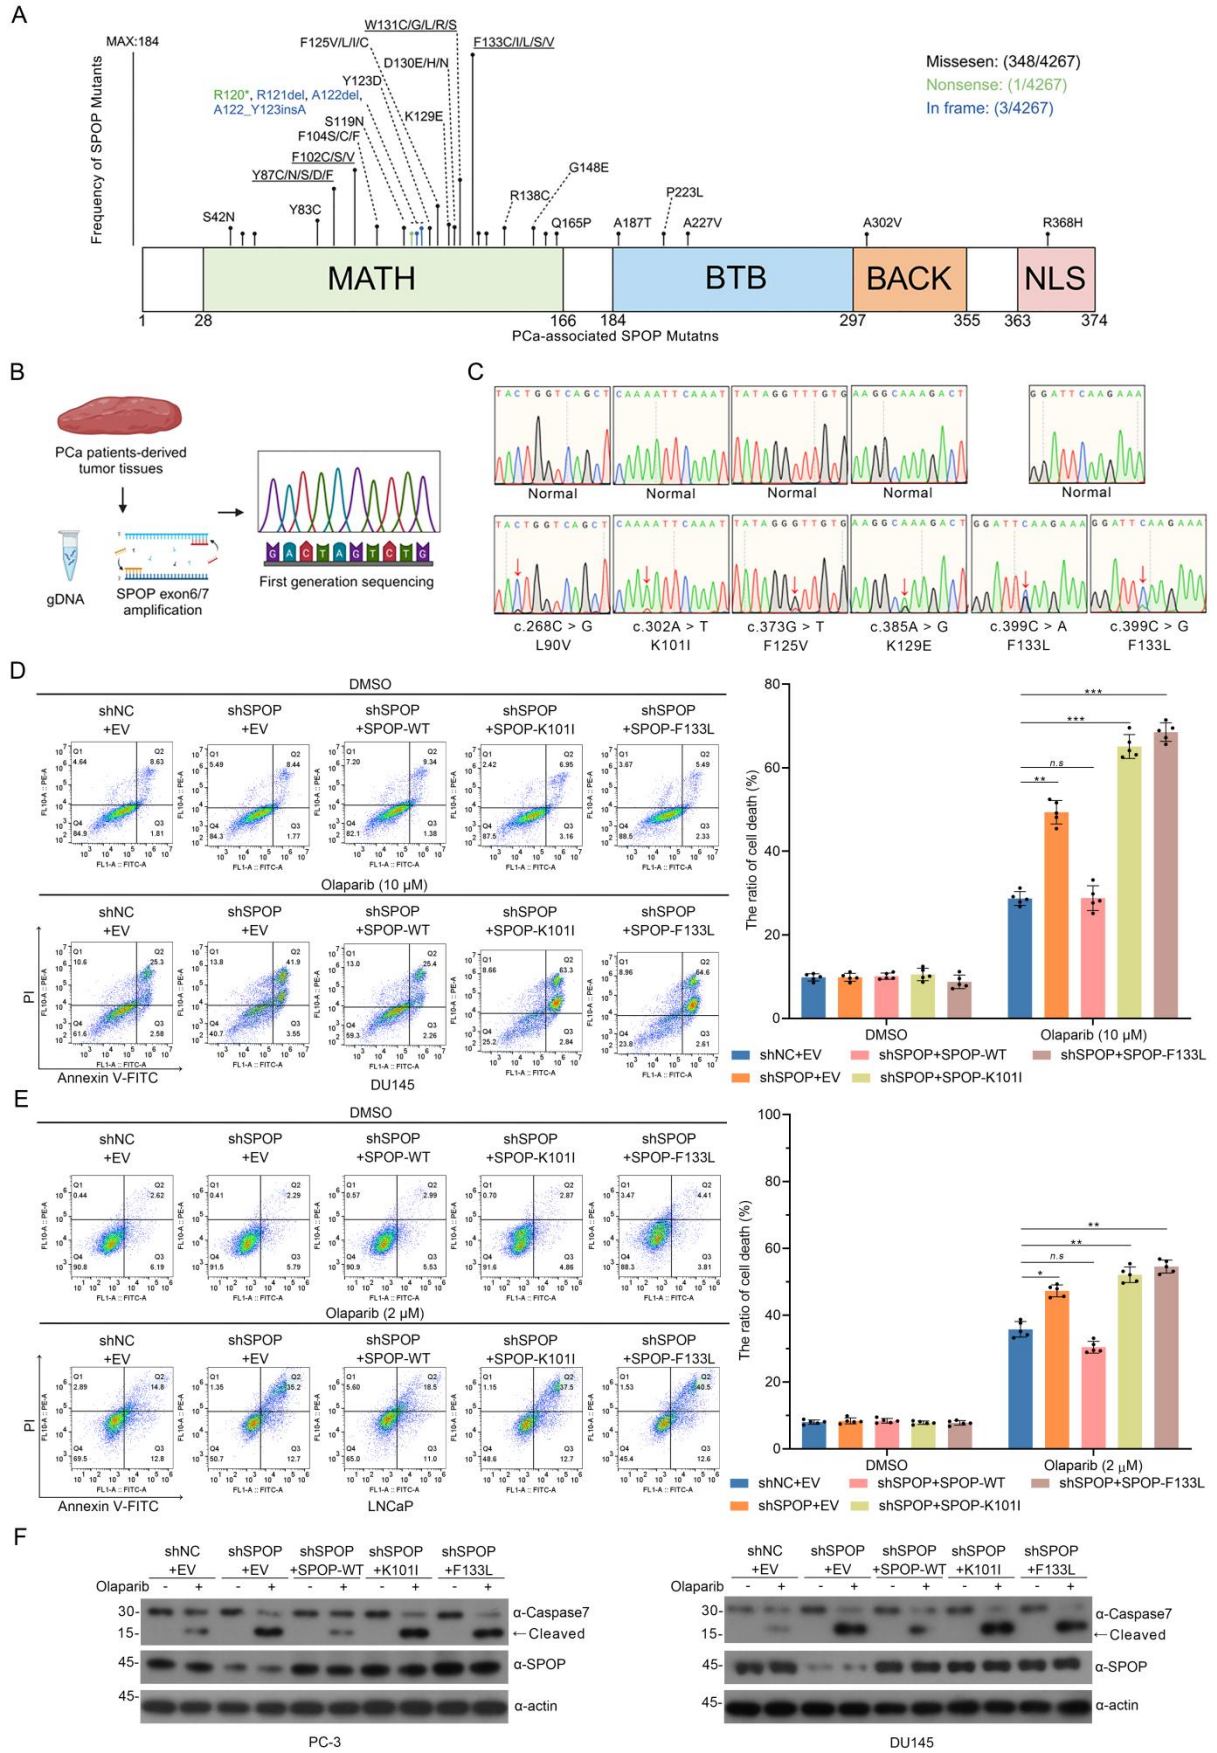

**Supplementary Figure 1. The high-frequency mutations of *SPOP* in PCa lead to increased sensitivity of PCa cells to Olaparib-induced apoptosis.** (A) *SPOP* mutations occur in 10-15% of PCa, and these mutations are predominantly located within the MATH domain. (B) Flowchart for identification of *SPOP* gene mutations in PCa patients. (C) In the collected 50 cases of PCa tissues, 6 cases were detected with missense mutations in the *SPOP* gene. (D) Representative images (left) and statistical graph (right) of flow cytometry showing the apoptosis levels of DU145 cells in each group induced by Olaparib (10  $\mu$ M). (E) Representative images (left) and statistical graph (right, n = 5) of flow cytometry showing the apoptosis levels of LNCaP cells in each group induced by Olaparib (2  $\mu$ M). (F) Western blotting of WCLs obtained from PC-3 (left) and DU145 (right) cells in each group under Olaparib (10  $\mu$ M) treatment; staining with anti-Caspase-7 antibodies. Data were shown as the mean  $\pm$  SD, two-tailed unpaired Student's t test. \* $P$ <0.05, \*\* $P$ <0.01, \*\*\* $P$ <0.001.

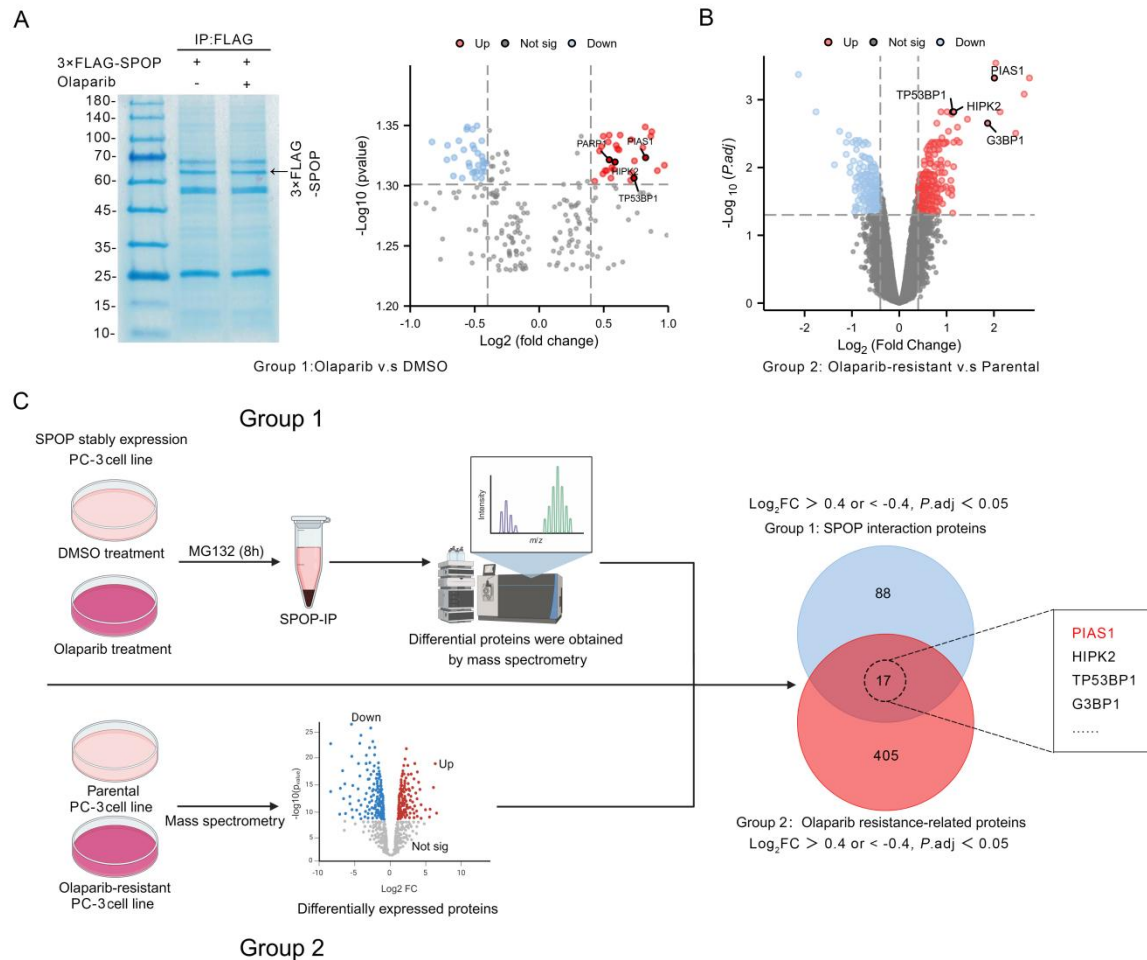

**Supplementary Figure 2. Proteomic analysis reveals proteins potentially involved in SPOP-associated DDR and the response of SPOP to Olaparib-induced apoptosis. (A)** 3×FLAG-SPOP protein complex are obtained from PC-3 cells under Olaparib (10  $\mu$ M) treatment or not through co-IP of anti-FLAG antibody and detected by Coomassie Blue staining (left) and mass spectrometry (right). Using bioinformatics to generate volcano plots, proteins with significant changes in interaction with SPOP under Olaparib (10  $\mu$ M) treatment were identified; Log<sub>2</sub> (fold change) > 0.4 or < -0.4, -Log<sub>10</sub> (p value) > 1.30. **(B)** Proteomic analysis of protein expression differences between Olaparib-resistant PC-3 cells and their corresponding parental cell lines was conducted, and Olaparib resistance-related proteins were identified by generating volcano plots; Log<sub>2</sub> (fold change) > 1 or < -1, -Log<sub>10</sub> (p value) > 1.30. **(C)** The specific workflow diagrams for **A** and **B**, as well as the VENN diagram identifying proteins with significant differential changes identified in **A** and **B**.

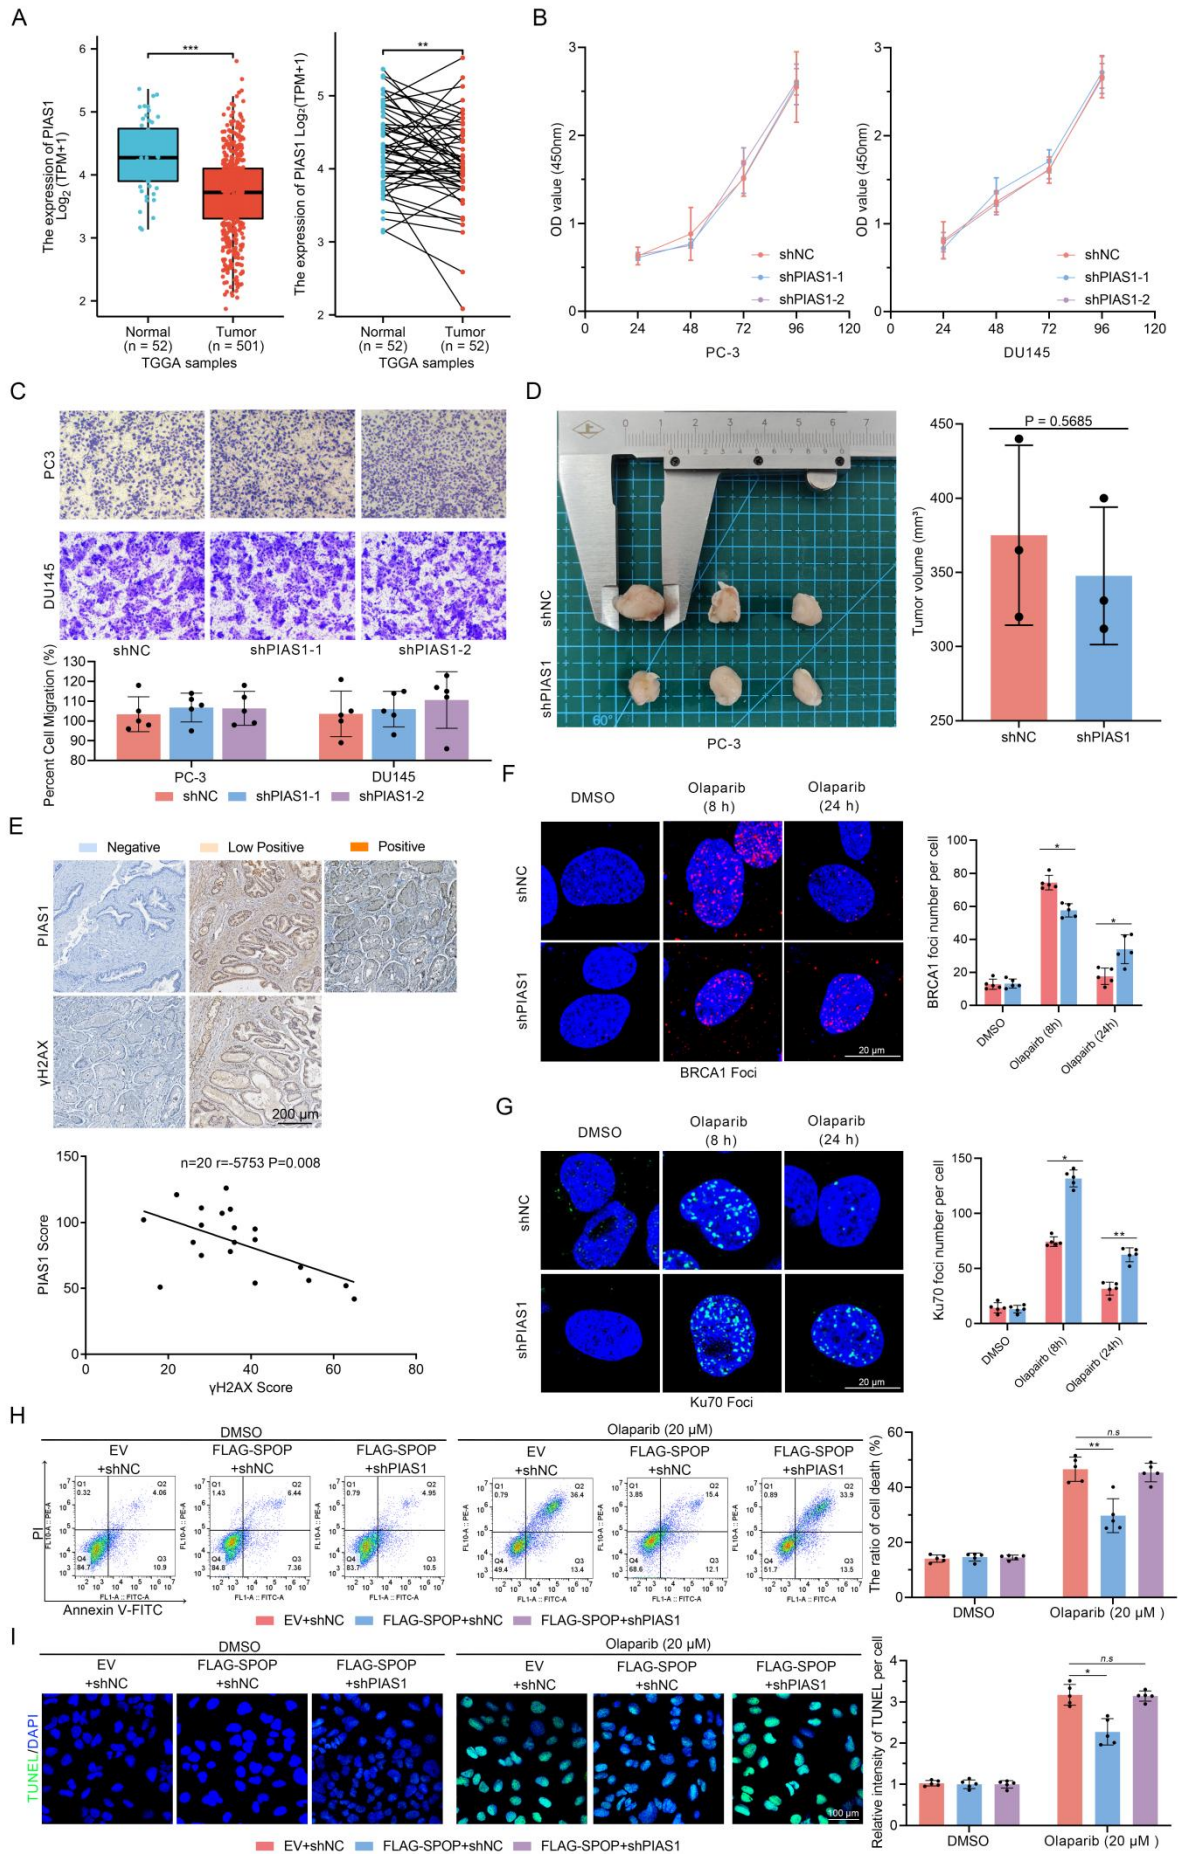

**Supplementary Figure 3. PIAS1 does not affect the proliferation, migration, and tumor formation of PCa cells but is involved in maintaining genomic stability.** (A) The TCGA database indicates a significant decrease in *PIAS1* mRNA levels in PCa compared to normal tissue. (B) The CCK-8 assay demonstrates that PIAS1 does not affect the proliferation of PC-3 and DU145 cells. (C) The migration assay (up) and corresponding statistical graph (down) reveals that PIAS1 does not affect the migration of PC-3 and DU145 cells. (D) The CDX models (left) and corresponding statistical graph (right) reveals that PIAS1 does not affect the tumor formation of PC-3 cells. (E) Representative images of IHC staining for  $\gamma$ H2AX and PIAS1 (up) in PCa tissues, along with the corresponding statistical analysis of staining intensity (down);  $n = 20$ ,  $r = -0.5753$ ,  $p = 0.008$ . (F) BRCA1 foci (left) were stained and corresponding statistical graph (right) in PC-3 cells; (G) Ku70 foci (left) were stained and corresponding statistical graph (right) in PC-3 cells. (H) Representative images (left) and statistical graph (right,  $n = 5$ ) of flow cytometry and TUNEL staining showing the apoptosis levels of PC-3 cells in each group under Olaparib (20  $\mu$ M) treatment. (I) Representative images (left) and statistical graph (right,  $n = 5$ ) of TUNEL staining showing the apoptosis levels of PC-3 cells in each group under Olaparib (20  $\mu$ M) treatment. Data were shown as the mean  $\pm$  SD, two-tailed unpaired Student's t test.  $*P < 0.05$ ,  $**P < 0.01$ ,  $***P < 0.001$ .



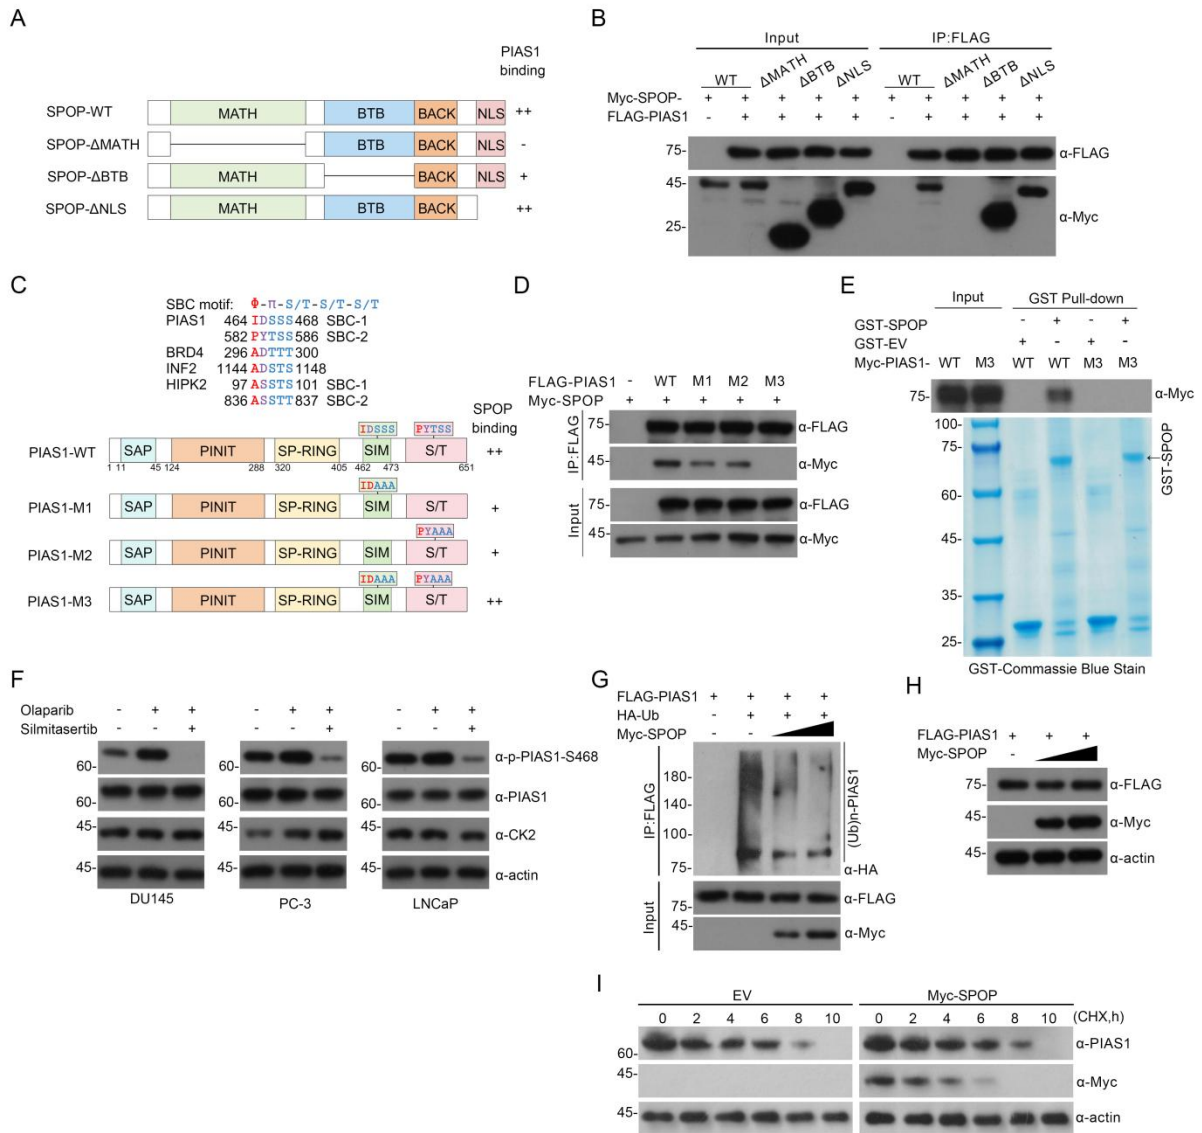

**Supplementary Figure 4. Identification of the domains/motifs involved in the interaction between PIAS1 and SPOP.** (A) Diagram showed SPOP-WT/ $\Delta$ MATH/ $\Delta$ BTB/ $\Delta$ NLS; (B) Western blotting of the indicated proteins in WCL and co-IP samples of anti-FLAG antibody obtained from HEK-293T cells transfected with indicated plasmids (right). (C) Diagram showed the potential SBC motif on PIAS1 and its corresponding mutants. (D) Western blot of the indicated proteins in WCL and co-IP samples of anti-FLAG antibody obtained from HEK-293T cells transfected with indicated plasmids. (E) *in vitro* (GST-SPOP pull-down) interaction assays from HEK-293T cells showed the impaired interaction of Myc-PIAS1-M3 and SPOP. (F) Western Blotting utilizing cell lysates from DU145/PC-3/LNCaP cells treated with Olaparib/Silmitasertib or not. (G) *In vivo* ubiquitination assay showed that SPOP did not mediate the ubiquitination of PIAS1. (H) Western blotting showed that SPOP did not affect the protein levels of PIAS1. (I) Western blotting showed that SPOP did not affect the protein degradation half-life of PIAS1.

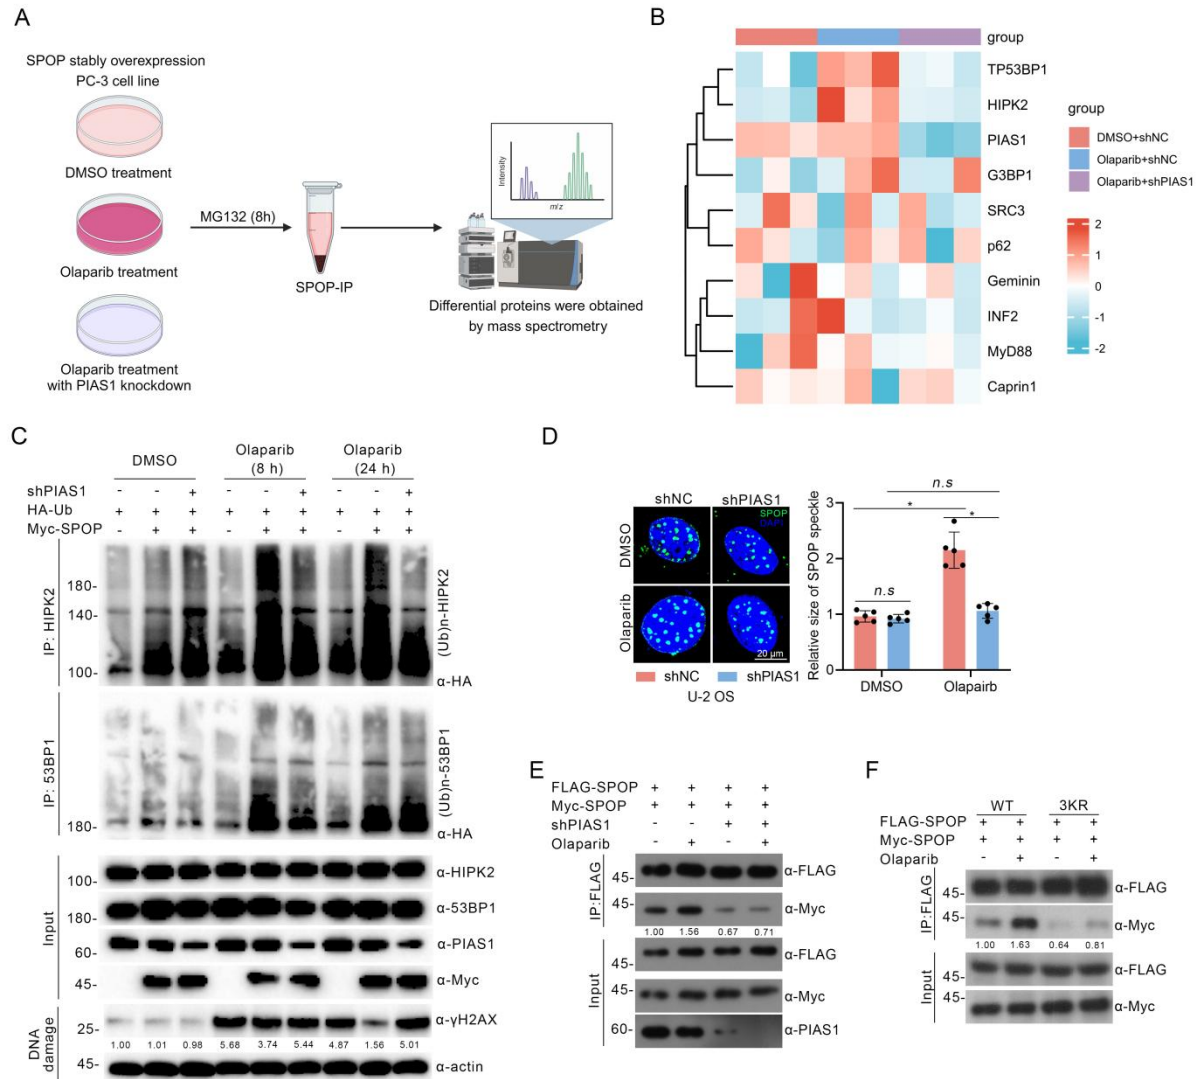

**Supplementary Figure 5. PIAS1-mediated SUMOylation of SPOP may influence SPOP-associated DDR.**

(A) The specific workflow diagrams of identification for SPOP-interacting substrates under the Olaparib treatment and *PIAS1* knockdown. (B) The heatmap shows changes in the interaction between SPOP and previously reported substrates following treatment with Olaparib and *PIAS1* knockdown. (C) *in vivo* ubiquitination assays showed the SPOP-mediated ubiquitination of HIPK2 and 53BP1 under Olaparib treatment through using lysate from HEK-293T cells transfected with Myc-SPOP and shPIAS1 plasmids. Western blotting and quantification of  $\gamma$ H2AX showed the DDR process of HEK-293T cells. (D) SPOP speckle were stained (left) and statistical graph (right) of speckle size. (E) co-IP utilizing cell lysates from FLAG-SPOP-WT/3KR and Myc-PIAS1 transfected HEK-293T cells treated with Olaparib or not, staining with FLAG and Myc antibodies. (F) co-IP utilizing cell lysates from FLAG-SPOP-WT/3KR and Myc-SPOP transfected HEK-293T cells treated with Olaparib or not, staining with FLAG and Myc antibody. Data were shown as the mean  $\pm$  SD, two-tailed unpaired Student's t test. \* $P$ <0.05.



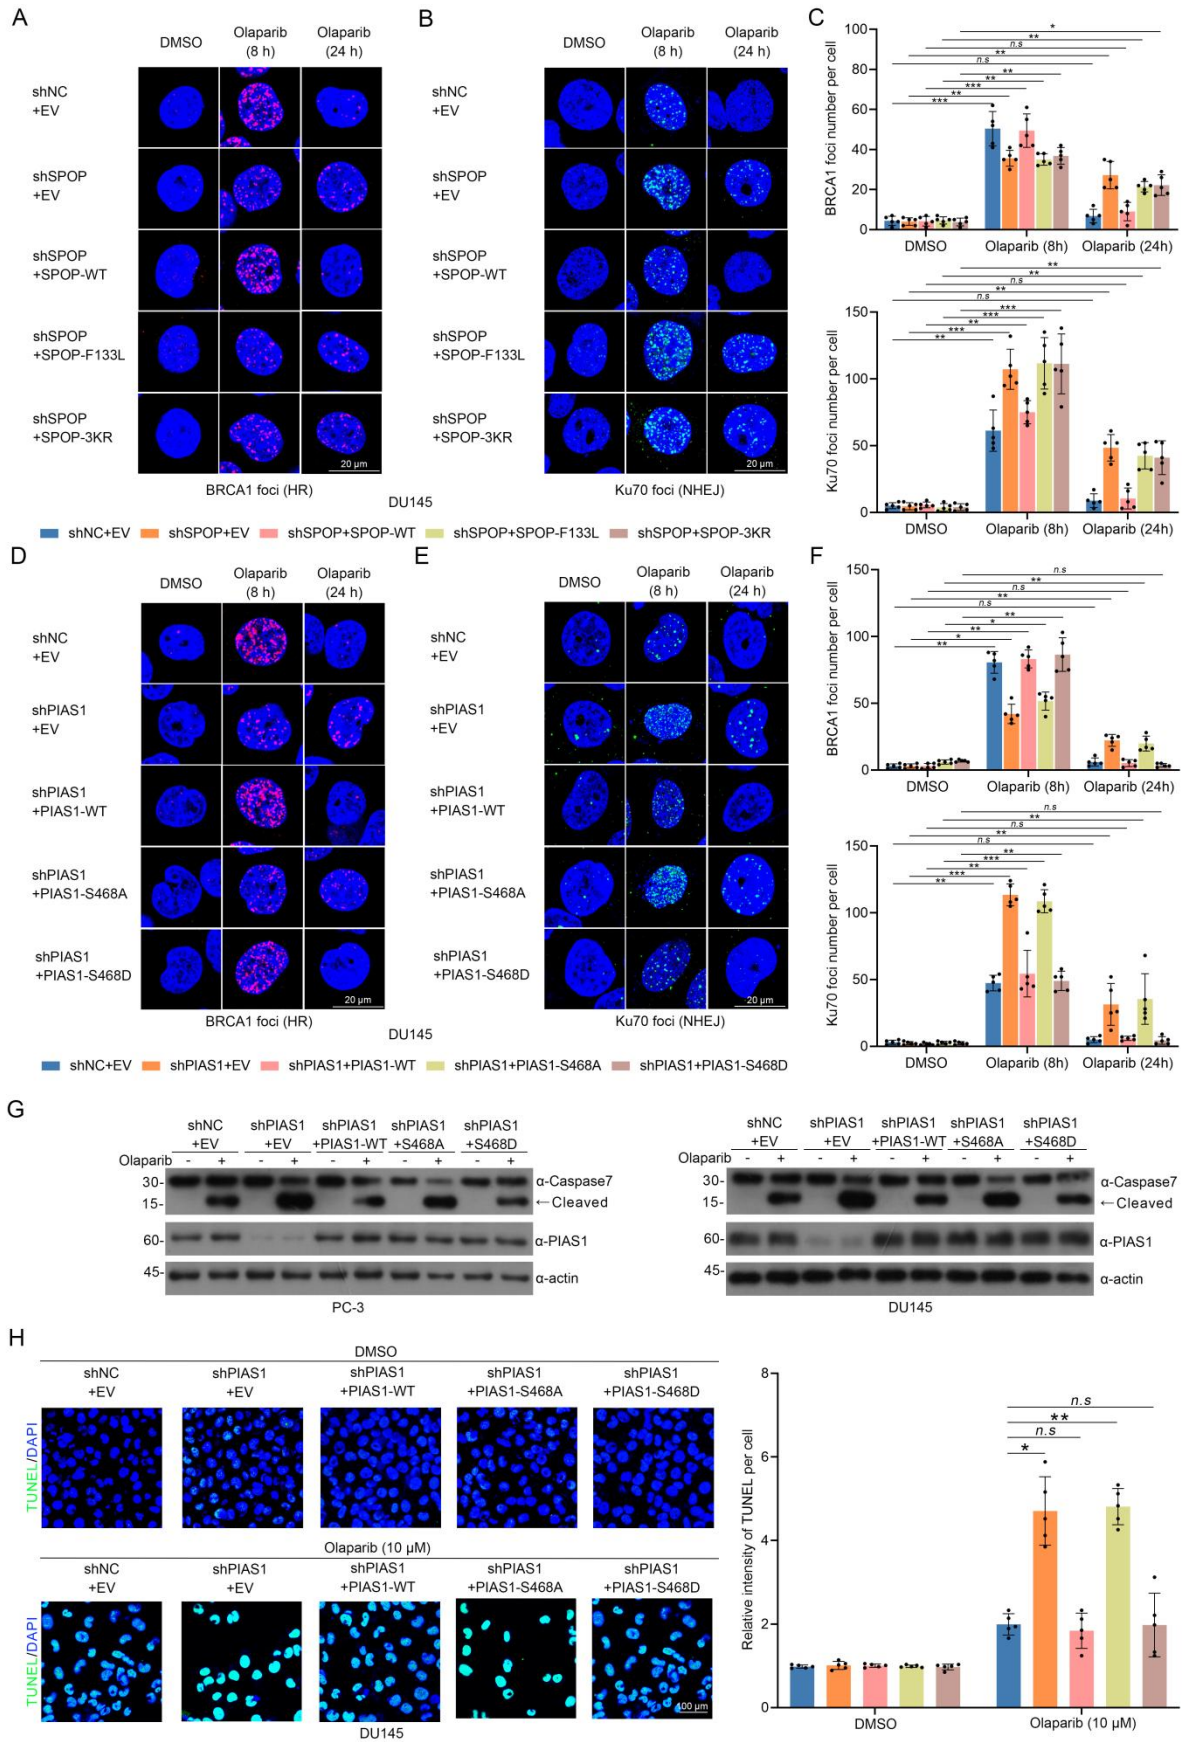

**Supplementary Figure 6. Deregulation of CK2-PIAS1-SPOP axis leads to impaired DDR, and sensitivity to Olaparib-induced apoptosis in PCa cells.** (A) BRCA1 foci were stained under Olaparib (10  $\mu$ M) treatment to determine the HR process in DU145 cells. (B) Ku70 foci were stained under Olaparib (10  $\mu$ M) treatment to determine the NHEJ process in DU145 cells. (C) Corresponding statistical graph of BRCA1 foci (up, n = 5) in (A) and Ku70 foci (down, n = 5) in (B). (D) BRCA1 foci were stained under Olaparib (10  $\mu$ M) treatment to determine the HR process in DU145 cells. (E) Ku70 foci were stained under Olaparib (10  $\mu$ M) treatment to determine the NHEJ process in DU145 cells. (F) Corresponding statistical graph of BRCA1 foci (up, n = 5) in (D) and Ku70 foci (down, n = 5) in (E). (G) WCLs obtained from PC-3 (left) and DU145 (right) cells in each group under Olaparib (10  $\mu$ M) treatment; staining with anti-Caspase-7 antibodies. (H) Representative images (left) and statistical graph (right, n = 5) of TUNEL staining showing the apoptosis levels of DU145 cells in each group under Olaparib (10  $\mu$ M) treatment. Data were shown as the mean  $\pm$  SD, two-tailed unpaired Student's t test. \* $P$ <0.05, \*\* $P$ <0.01, \*\*\* $P$ <0.001.

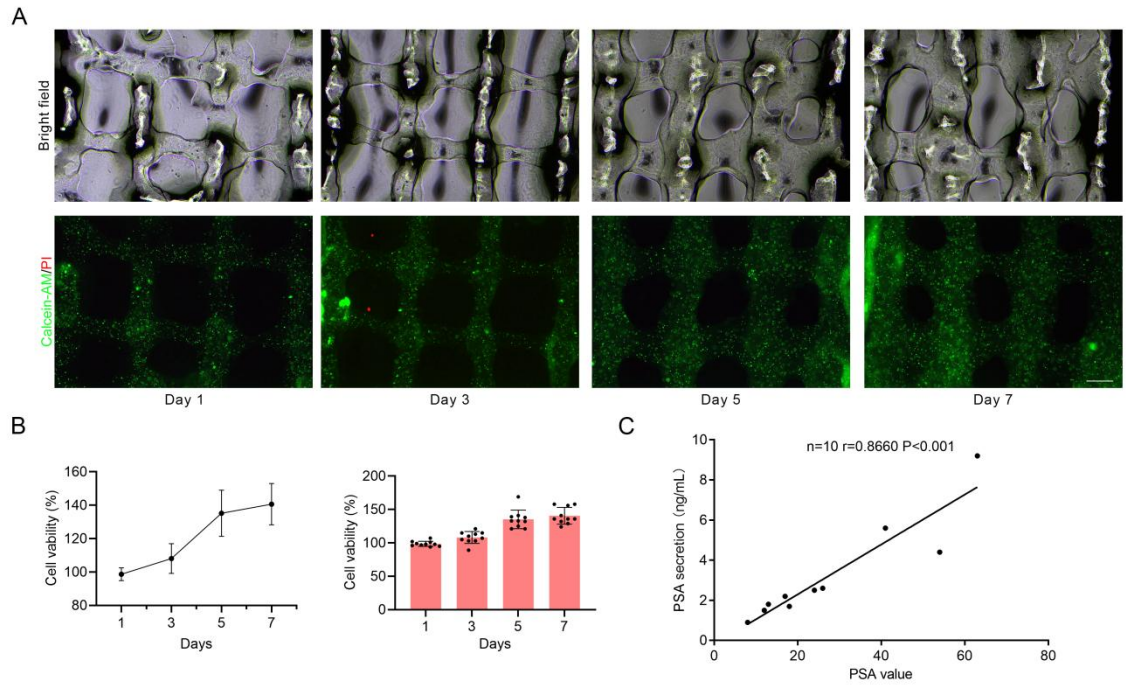

**Supplementary Figure 7. Constructing 3D-POs. (A)** Calcein-AM/PI staining of 3DP-POs after construction in day 1/3/5/7. **(B)** 3D cell viability assays of 3DP-POs after construction in day 1/3/5/7 ( $n = 10$ ). **(C)** The correlation between PSA secretion from 3DP-POs and the PSA value obtained from patients clinical data.

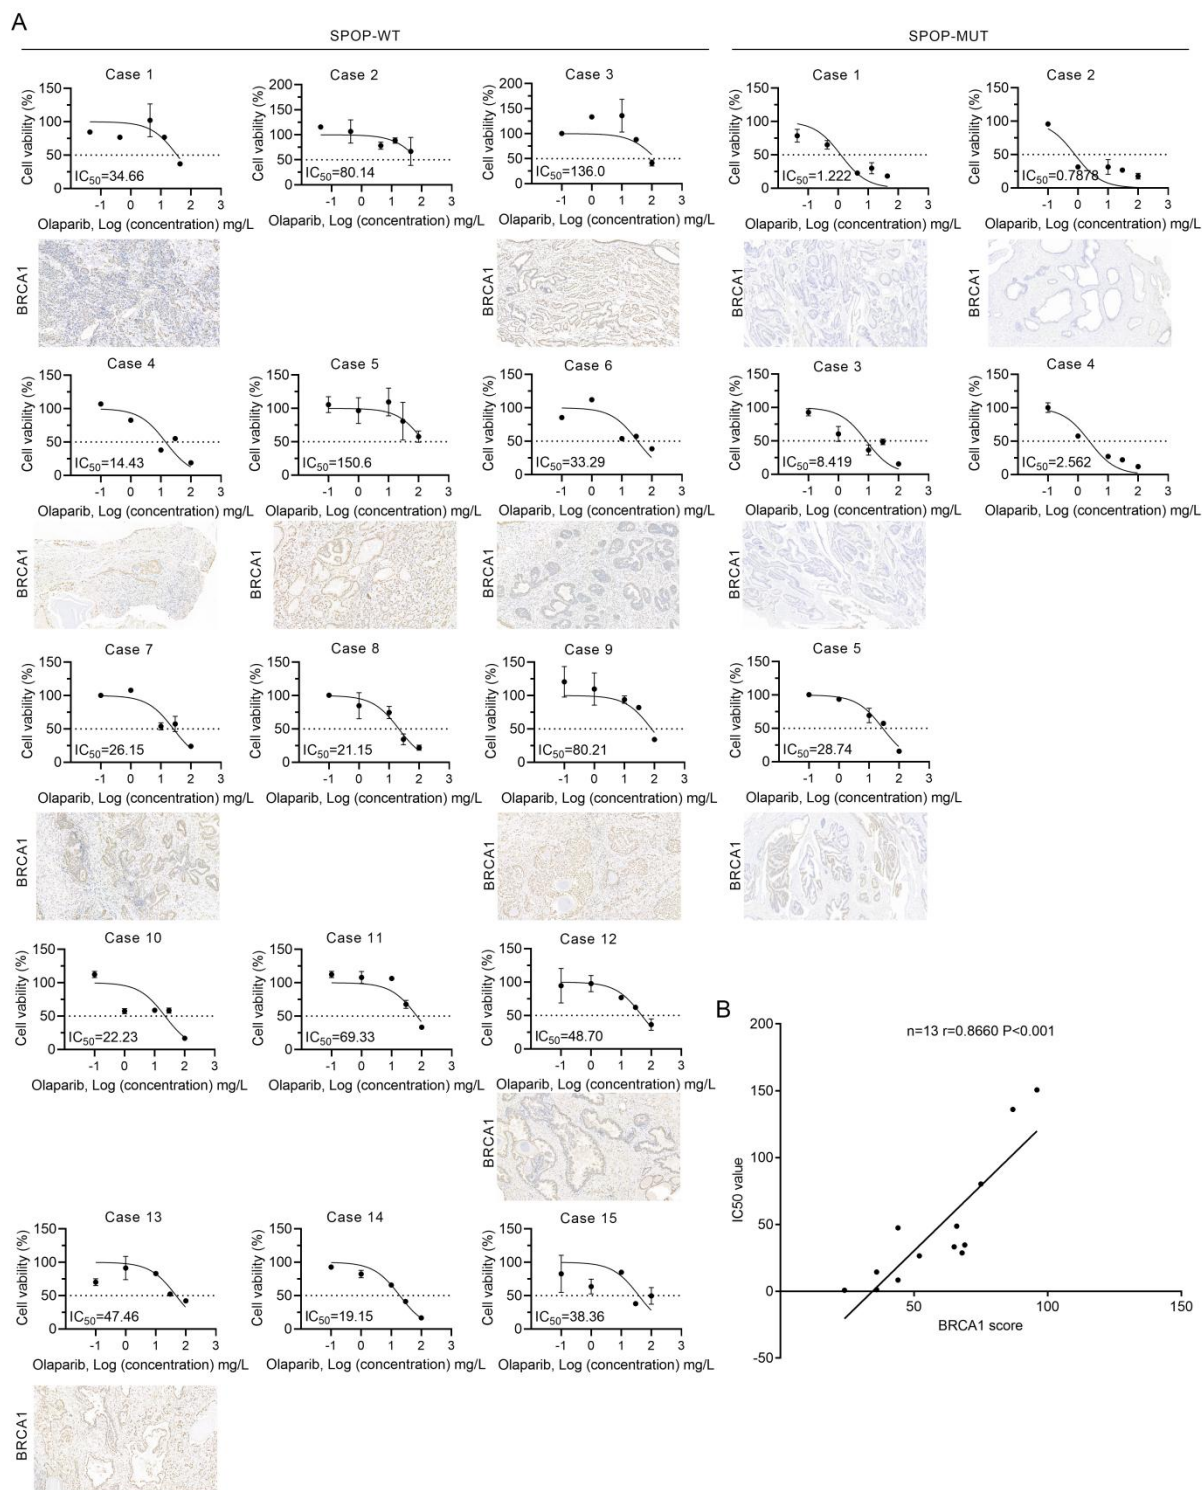

**Supplementary Figure 8.** (A) The 3D-POs were divided into two groups (SPOP-WT, n = 15; SPOP-MUT, n = 5) based on the *SPOP* gene mutation; the IC<sub>50</sub> value of each 3D-POs to Olaparib in all cases were determined, and corresponding BRCA1 staining in partial cases were staining. (B) Correlation analysis between the BRCA1 staining and the IC<sub>50</sub> values (n = 13, r=0.8660, P<0.001 ).



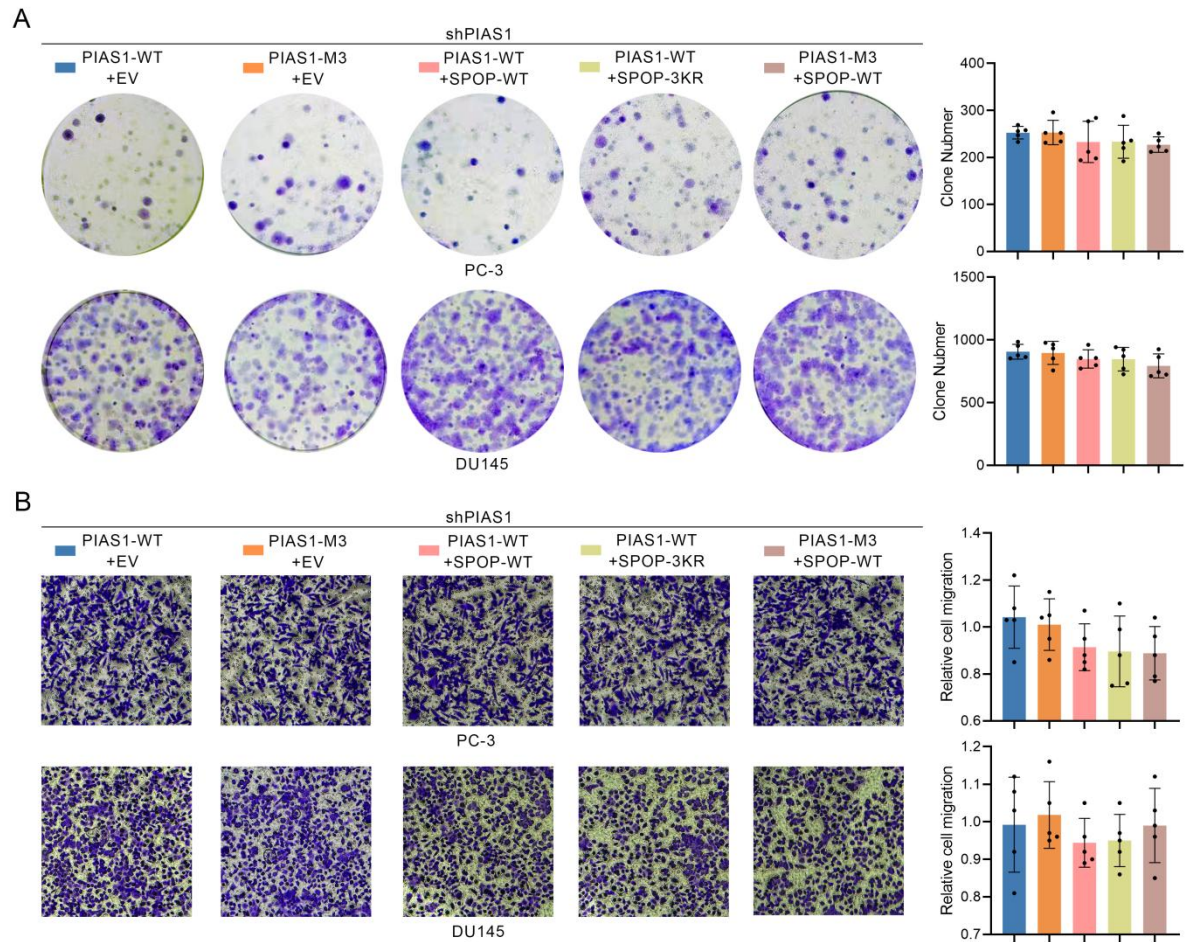

**Supplementary Figure 9. (A)** The colony formation (left) and corresponding statistical graph (right; n = 5) demonstrates proliferation ability of PC-3 and DU145 cells. **(B)** The migration assay (left) and corresponding statistical graph (right; n = 5) demonstrates migration ability of PC-3 and DU145 cells.



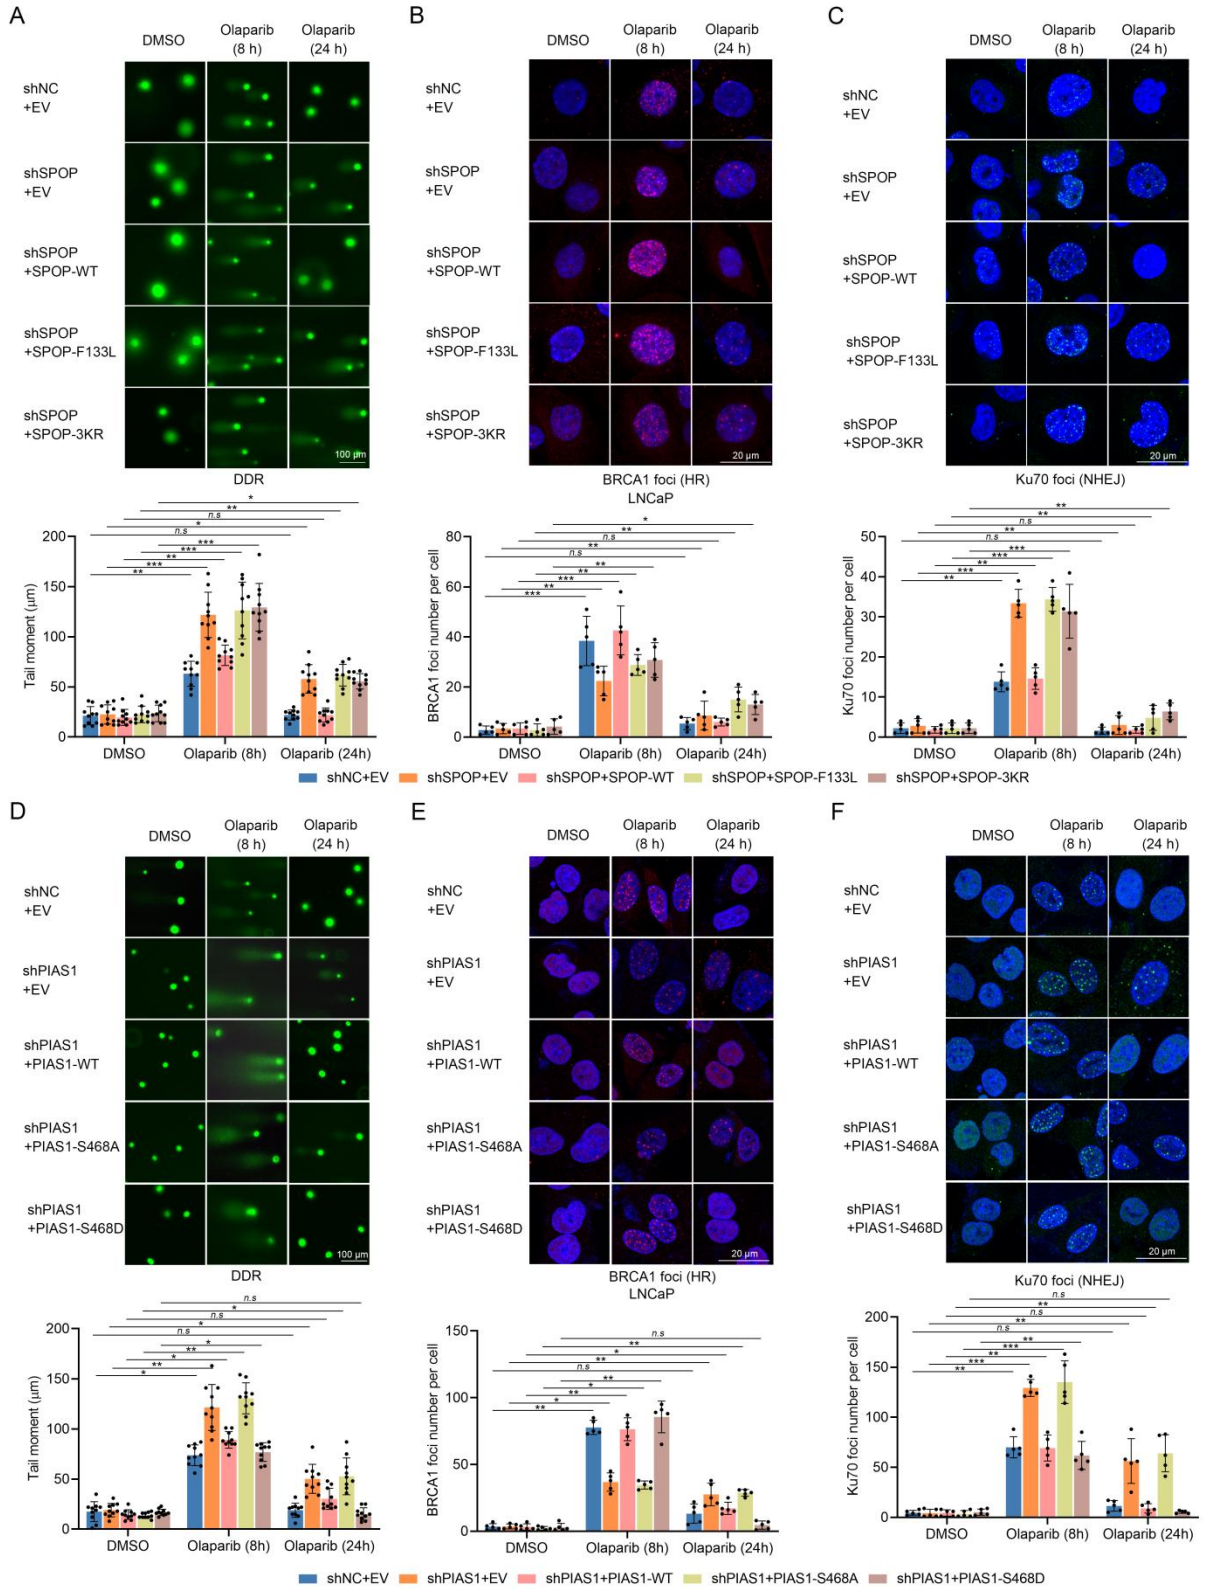

**Supplementary Figure 10.** (A) The comet assays revealed the overall DDR process in LNCaP cells under Olaparib treatment (2  $\mu$ M), and the representative images (up) and statistical graph (down, n = 10) . The comet assays were then performed and 10 cells from each sample were analyzed based on the tail moment, utilizing the Komet software. (B) BRCA1 foci were stained (up) and corresponding statistical graph (down, n =5) under Olaparib (2  $\mu$ M) treatment to determine the HR process in LNCaP cells. (C) Ku70 foci were stained (up) and corresponding statistical graph (down, n =5) under Olaparib (2  $\mu$ M) treatment to determine the NHEJ process in LNCaP cells. (D) The comet assays revealed the overall DDR process in LNCaP cells under Olaparib treatment (2  $\mu$ M), and the representative images (up) and statistical graph (down, n = 10) . The comet assays were then performed and 10 cells from each sample were analyzed based on the tail moment, utilizing the Komet software. (E) BRCA1 foci were stained (up) and corresponding statistical graph (down, n =5) under Olaparib (2  $\mu$ M) treatment to determine the HR process in LNCaP cells. (F) Ku70 foci were stained (up) and corresponding statistical graph (down, n =5) under Olaparib (2  $\mu$ M) treatment to determine the NHEJ process in LNCaP cells. \* $P$ <0.05, \*\* $P$ <0.01, \*\*\* $P$ <0.001.

**Supplementary Table 1. Association between the *SPOP* gene mutations and clinic pathological features in PCa patients**

| Characteristics           | SPOP-WT  | SPOP-MUT | P value |
|---------------------------|----------|----------|---------|
| n                         | 44       | 6        |         |
| Pathologic T stage, n (%) |          |          | 0.5682  |
| T2                        | 10 (20%) | 2 (4%)   |         |
| T3&T4                     | 34 (68%) | 4 (8%)   |         |
| Clinical M stage, n (%)   |          |          | 0.4413  |
| M0                        | 40 (80%) | 6 (12%)  |         |
| M1                        | 4 (8%)   | 0 (0%)   |         |
| Pathologic N stage, n (%) |          |          | 0.5940  |
| N0                        | 42 (84%) | 6 (12%)  |         |
| N1                        | 2 (4%)   | 0 (0%)   |         |
| Gleason score, n (%)      |          |          | 0.6466  |
| 6&7                       | 25 (50%) | 4 (8%)   |         |
| 8&9&10                    | 19 (38%) | 2 (4%)   |         |
| PSA Level                 |          |          | 0.6806  |
| <10                       | 8 (16%)  | 2 (4%)   |         |
| 10–50                     | 26 (52%) | 3 (6%)   |         |
| >50                       | 10 (20%) | 1 (2%)   |         |

**Supplementary Table 2. The primers, shRNA and siRNA sequence, antibodies and chemicals**

| Primers sequence         |                                                                 |         |         |          |
|--------------------------|-----------------------------------------------------------------|---------|---------|----------|
| Gene                     | Sequence 5'-3'                                                  |         |         |          |
| SPOP-exon6-F             | TTTTCTATCTGTTTTGGACAGG                                          |         |         |          |
| SPOP-exon6-R             | CAAAGCCACAACCTTGTCAGTG                                          |         |         |          |
| SPOP-exon7-F             | TTTGCGAGTAACCCCAAAG                                             |         |         |          |
| SPOP-exon7-R             | CTCATCAGATCTGGGAACTGC                                           |         |         |          |
| SPOP-L90V-F              | AGACAGTGCATCTGATGAAGAGGAAGAAGAGCC                               |         |         |          |
| SPOP-L90V-R              | CATCAGATGCACTGTCTATGGTTAGGTCAATCACTTCT                          |         |         |          |
| SPOP-K101I-F             | GTGAAGTTCGGGCAATATTCAAATTCTCCATCCTGAATGC                        |         |         |          |
| SPOP-K101I-R             | TATTGCCCCGAACCTCACTCTTTGGACAGCTGA                               |         |         |          |
| PIAS1-S466A-F            | CCATAGACGCTTCATCTGATGAAGAGGAAGAAGAGC                            |         |         |          |
| PIAS1-S466A-R            | CAGATGAAGCGTCTATGGTTAGGTCAATCACTTCTACTT                         |         |         |          |
| PIAS1-S467A-F            | AGACAGTGCATCTGATGAAGAGGAAGAAGAGCC                               |         |         |          |
| PIAS1-S467A-R            | CATCAGATGCACTGTCTATGGTTAGGTCAATCACTTCT                          |         |         |          |
| PIAS1-S468A-F            | GACAGTTCGCTGATGAAGAGGAAGAAGAGCCA                                |         |         |          |
| PIAS1-S468A-R            | TTCATCAGCGAACTGTCTATGGTTAGGTCAATCACTT                           |         |         |          |
| PIAS1-S466D-F            | CCATAGACGATTCATCTGATGAAGAGGAAGAAGAGC                            |         |         |          |
| PIAS1-S466D-R            | CAGATGAATCGTCTATGGTTAGGTCAATCACTTCTACTT                         |         |         |          |
| PIAS1-S467D-F            | AGACAGTGACTCTGATGAAGAGGAAGAAGAGCCA                              |         |         |          |
| PIAS1-S467D-R            | CATCAGAGTCACTGTCTATGGTTAGGTCAATCACTTCT                          |         |         |          |
| PIAS1-S468D-F            | GTTTCAGATGATGAAGAGGAAGAAGAGCCATC                                |         |         |          |
| PIAS1-S468D-R            | CCTCTTCATCATCTGAACTGTCTATGGTTAGGTCAATCA                         |         |         |          |
| shRNA and siRNA sequence |                                                                 |         |         |          |
| Gene                     | Sequence 5'-3'                                                  |         |         |          |
| shPIAS1-1                | CCGGGCAAATGGTTATGAGCCTTAGCTCGAGCTAAGGCTCATAACCATT<br>TGCTTTTTT  |         |         |          |
| shPIAS1-2                | CCGGGCAACTTTGTCTCCATCTACCCTCGAGGGTAGATGGAGACAAAGTT<br>TGCTTTTTT |         |         |          |
| shSPOP                   | GGTTAGATGAAGAAAGCAAAGTTCAAGAGACTTTGCTTTCTTCATCTAAC<br>C         |         |         |          |
| Antibodies and Chemicals |                                                                 |         |         |          |
| No.                      | Name                                                            | Species | Cat No. | Source   |
| 1                        | Anti-Myc-HRP                                                    | Mouse   | M192-7  | MBL      |
| 2                        | Anti-FLAG-HRP                                                   | Mouse   | M185-7  | MBL      |
| 3                        | Anti-HA-HRP                                                     | Mouse   | M180-7  | MBL      |
| 4                        | Anti-SUMO1                                                      | Rabbit  | A19121  | Abclonal |
| 5                        | Anti-SUMO2/3                                                    | Rabbit  | A5066   | Abclonal |
| 6                        | Anti-γH2AX                                                      | Rabbit  | AP0687  | Abclonal |
| 7                        | Anti-BRCA1                                                      | Rabbit  | A11034  | Abclonal |
| 8                        | Anti-Ku70                                                       | Rabbit  | A0883   | Abclonal |
| 9                        | Anti-CK-5                                                       | Rabbit  | A11396  | Abclonal |
| 10                       | Anti-β-actin                                                    | Mouse   | AC043   | Abclonal |
| 11                       | Anti-HA                                                         | Mouse   | AE008   | Abclonal |

|    |                            |        |             |             |
|----|----------------------------|--------|-------------|-------------|
| 12 | Anti-HIPK2                 | Rabbit | ab108543    | abcam       |
| 13 | Anti-53BP1                 | Rabbit | ab175933    | abcam       |
| 14 | Anti-AR                    | Rabbit | 22089-1-AP  | Proteintech |
| 15 | Anti-PIAS1                 | Rabbit | R383086     | zenbio      |
| 16 | Anti-Caspase-7             | Rabbit | 9492        | CST         |
| 17 | CHX                        |        | HY-B0713    | MCE         |
| 18 | Olaparib                   |        | T3015       | TOPSCIENCE  |
| 19 | IPTG                       |        | T4336       | TOPSCIENCE  |
| 20 | SPOP-IN-6b                 |        | T16922      | TOPSCIENCE  |
| 21 | Silmitasertib              |        | T2259       | TOPSCIENCE  |
| 22 | Lambda Protein Phosphatase |        | P2316       | Beyotime    |
| 23 | Anti- $\gamma$ H2AX        | Rabbit | ab81299     | abcam       |
| 24 | Anti-PIAS1-Ser468          | Rabbit | custom-made | Biodragon   |

---
